# Supplementary material for: Characterization and Application of EST-SSR Markers Developed from Transcriptome Sequences in Elymus breviaristatus (Poaceae: Triticeae)
Source: MDPI journal article supplement (doi:10.3390/genes14020302), 2023-01-23
Supplement: s1 [file s1]

**Table S1.** Geographic information of the 12 *E. breviaristatus* populations.

| Pop ID | Pop Size | Collection Site                                     | Latitude      | Longitude     | Altitude (m) |
|--------|----------|-----------------------------------------------------|---------------|---------------|--------------|
| Pop1   | 15       | Zhubalong, Markam Country, Qamdo Prefecture         | 29°44'11.950" | 98°43'23.122" | 3530         |
| Pop2   | 15       | Wangda, Zogang Country, Qamdo Prefecture            | 29°42'27.821" | 97°47'29.187" | 3840         |
| Pop3   | 14       | Jida, Baxoi Country, Qamdo Prefecture               | 29°59'01.579" | 96°40'13.665" | 3776         |
| Pop4   | 15       | Ranwu, Baxoi Country, Qamdo Prefecture              | 29°32'26.570" | 96°46'40.956" | 3820         |
| Pop5   | 15       | Zhaxigang, Maizhokunggar Country, Lhasa Prefecture  | 29°44'14.377" | 90°49'25.706" | 4025         |
| Pop6   | 15       | Yala, Sog Country, Nagqu Prefecture                 | 31°49'35.868" | 93°33'43.773" | 4071         |
| Pop7   | 15       | Bada, Dengqen Country, Qamdo Prefecture             | 31°41'18.650" | 94°53'56.544" | 4525         |
| Pop8   | 15       | Bingda, Riwoqe Country, Qamdo Prefecture            | 31°07'09.215" | 96°47'34.984" | 3708         |
| Pop9   | 15       | Chaiwei, Karuo District, Qamdo Prefecture           | 31°28'50.879" | 97°14'19.888" | 3392         |
| Pop10  | 15       | Qingnidong, Jomda Country, Qamdo Prefecture         | 31°19'28.580" | 97°56'16.266" | 3952         |
| Pop11  | 15       | Jiaxing, Gongbo'gyamda Country, Nyingchi Prefecture | 29°52'47.348" | 92°42'05.058" | 3969         |
| Pop12  | 15       | Tiantuo, Zogang Country, Qamdo Prefecture           | 29°51'06.854" | 97°41'04.325" | 3909         |

**Table S2.** Details of the species used to detect the transferability of molecular markers in this study.

| Species                                 | Genome | Accessions PI | Origins               |
|-----------------------------------------|--------|---------------|-----------------------|
| <i>E. dahuricus</i>                     | StHY   | PI639853      | Xizang, China         |
| <i>E. dahuricus</i> var. <i>violeus</i> | StHY   | HY-3          | Sichuan, China        |
| <i>E. atratus</i>                       | StHY   | HY-1          | Sichuan, China        |
| <i>E. cylindricus</i>                   | StHY   | HY-4          | Sichuan, China        |
| <i>E. excelsus</i>                      | StHY   | G05449        | Inner Mongolia, China |
| <i>E. purpuraristatus</i>               | StHY   | KD-1          | Sichuan, China        |
| <i>E. himalayanus</i>                   | StHY   | H4134         | Pakistan              |
| <i>E. drobovii</i>                      | StHY   | H10299        | Iran                  |
| <i>E. nutans</i>                        | StHY   | Y2196         | Xizang, China         |
| <i>E. breviaristatus</i>                | StHY   | PI504447      | China                 |
| <i>E. submuticus</i>                    | StHY   | PI531684      | China                 |
| <i>E. tangutorum</i>                    | StHY   | HY-1          | Sichuan, China        |
| <i>R. kamoji</i>                        | StHY   | R273          | Sichuan, China        |
| <i>E. tsukushiensis</i>                 | StHY   | PI499623      | Japan                 |
| <i>E. humidus</i>                       | StHY   | J3279S        | Japan                 |
| <i>E. schrenkianus</i>                  | StHY   | PI659920      | Kyrgyzstan            |
| <i>R. aristiglumis</i>                  | StHY   | PI598486      | Xinjiang, China       |
| <i>E. tschimganicus</i>                 | StStY  | W614438       | Kazakhstan            |
| <i>E. glaucissimus</i>                  | StStY  | PI611142      | Kazakhstan            |
| <i>E. transhyrcanus</i>                 | StStH  | PI383579      | Ukraine               |
| <i>E. repens</i>                        | StStH  | PI565006      | Russian Federation    |
| <i>E. patagonicus</i>                   | StHH   | PI297898      | Argentina             |
| <i>E. scabriglumis</i>                  | StHH   | PI331168      | Argentina             |

**Table S3.** Detailed information of EST-SSRs based on the number of nucleotide repeat unit.

| Repeats   | 5    | 6    | 7   | 8   | 9   | 10   | 11   | 12  | 13  | 14  | 15  | 16  | 17  | 18 | 19 | 20 | > 20 | Total |
|-----------|------|------|-----|-----|-----|------|------|-----|-----|-----|-----|-----|-----|----|----|----|------|-------|
| A/T       | -    | -    | -   | -   | -   | 3469 | 1337 | 747 | 359 | 319 | 240 | 231 | 129 | 66 | 67 | 40 | 760  | 7764  |
| C/G       | -    | -    | -   | -   | -   | 147  | 123  | 93  | 122 | 83  | 92  | 51  | 51  | 39 | 36 | 57 | 438  | 1332  |
| AC/GT     | -    | 559  | 220 | 223 | 97  | 89   | 93   | 83  | 20  | 45  | 38  | 27  | 18  | 15 | 34 | 21 | 45   | 1627  |
| AG/CT     | -    | 1173 | 563 | 369 | 396 | 170  | 171  | 209 | 67  | 71  | 85  | 76  | 59  | 41 | 38 | 23 | 91   | 3602  |
| AT/AT     | -    | 242  | 132 | 61  | 43  | 26   | 36   | 15  | 20  | 10  | 15  | 7   | 9   | 7  | 6  | 6  | 26   | 661   |
| CG/CG     | -    | 289  | 46  | 15  | 1   |      |      |     |     |     |     |     |     |    |    |    | 0    | 351   |
| AAC/GTT   | 140  | 66   | 40  | 46  | 10  | 4    | 6    |     | 3   |     |     |     |     |    |    |    | 0    | 315   |
| AAG/CTT   | 614  | 204  | 90  | 58  | 6   | 18   | 13   | 7   | 14  | 3   | 1   |     |     |    |    |    | 0    | 1028  |
| AAT/ATT   | 59   | 37   | 9   | 15  | 3   | 11   |      |     | 2   |     |     |     |     |    | 1  |    | 0    | 137   |
| ACC/GGT   | 490  | 232  | 60  | 14  | 2   | 10   |      |     | 1   |     |     |     |     |    |    |    | 0    | 809   |
| ACG/CGT   | 503  | 165  | 50  | 17  | 4   | 3    |      |     |     |     |     |     |     |    |    |    | 0    | 742   |
| ACT/AGT   | 81   | 42   | 12  | 4   | 9   |      |      |     |     |     |     |     |     |    | 5  |    | 0    | 153   |
| AGC/CTG   | 1349 | 584  | 189 | 99  | 16  | 15   | 2    | 1   |     |     |     |     | 1   | 2  |    |    | 0    | 2258  |
| AGG/CCT   | 1533 | 660  | 214 | 106 | 9   | 16   | 3    | 5   | 2   |     |     |     |     |    |    |    | 0    | 2548  |
| ATC/ATG   | 377  | 118  | 68  | 22  | 4   | 11   |      | 1   |     | 2   |     |     |     |    |    |    | 0    | 603   |
| CCG/CGG   | 3541 | 1436 | 628 | 179 | 25  | 8    | 3    | 3   |     |     |     |     |     |    |    |    | 0    | 5823  |
| AAAC/GTTT | 7    | 2    |     |     |     |      |      |     |     |     |     |     |     |    |    |    | 0    | 9     |
| AAAG/CTTT | 28   | 12   | 3   | 1   | 1   |      |      |     |     |     |     |     |     |    |    |    | 0    | 45    |
| AAAT/ATTT | 11   | 1    |     |     |     |      |      |     |     |     |     |     |     |    |    |    | 0    | 12    |
| AACC/GGTT | 14   | 3    |     |     |     |      |      |     |     |     |     |     |     |    |    |    | 0    | 17    |
| AACG/CGTT | 1    | 1    |     |     |     |      |      |     |     |     |     |     |     |    |    |    | 0    | 2     |
| AAGC/CTTG | 22   | 2    |     |     |     |      |      |     |     |     |     |     |     |    |    |    | 0    | 24    |
| AAGG/CCTT | 43   | 18   | 1   |     |     |      |      |     |     |     |     |     |     |    |    |    | 0    | 62    |
| AATC/ATTG | 10   | 8    |     |     |     |      |      |     |     |     |     |     |     |    |    |    | 0    | 18    |
| AATG/ATTC | 8    | 9    | 2   |     |     |      |      |     |     |     |     |     |     |    |    |    | 0    | 19    |
| AATT/AATT | 1    |      |     |     |     |      |      |     |     |     |     |     |     |    |    |    | 0    | 1     |
| ACAG/CTGT | 4    |      |     |     |     |      |      |     |     |     |     |     |     |    |    |    | 0    | 4     |
| ACAT/ATGT | 17   | 21   | 1   | 9   |     |      |      |     |     |     |     |     |     |    |    |    | 0    | 48    |
| ACCC/GGGT | 1    |      |     |     |     |      |      |     |     |     |     |     |     |    |    |    | 0    | 1     |
| ACCG/CGGT | 10   |      |     |     |     |      |      |     |     |     |     |     |     |    |    |    | 0    | 10    |
| ACCT/AGGT | 4    | 3    |     |     |     |      |      |     |     |     |     |     |     |    |    |    | 0    | 7     |
| ACGC/CGTG | 57   | 11   |     |     |     |      |      |     |     |     |     |     |     |    |    |    | 0    | 68    |
| ACGG/CCGT | 14   | 2    | 2   |     |     |      |      |     |     |     |     |     |     |    |    |    | 0    | 18    |
| ACGT/ACGT | 7    |      |     |     |     |      |      |     |     |     |     |     |     |    |    |    | 0    | 7     |
| ACTC/AGTG | 1    | 2    |     |     |     |      |      |     |     |     |     |     |     |    |    |    | 0    | 3     |
| ACTG/AGTC | 6    | 1    |     |     |     |      |      |     |     |     |     |     |     |    |    |    | 0    | 7     |
| AGAT/ATCT | 5    | 10   | 1   |     | 2   |      | 1    | 2   |     |     |     |     |     |    |    |    | 0    | 21    |
| AGCC/CTGG | 18   | 4    |     |     |     |      |      |     |     |     |     |     |     |    |    |    | 0    | 22    |
| AGCG/CGCT | 23   | 7    |     |     |     |      |      |     |     |     |     |     |     |    |    |    | 0    | 30    |
| AGCT/AGCT | 6    |      |     |     |     |      |      |     |     |     |     |     |     |    |    |    | 0    | 6     |
| AGGC/CCTG | 41   | 18   |     |     |     |      |      |     |     |     |     |     |     |    |    |    | 0    | 59    |
| AGGG/CCCT | 51   | 17   |     |     |     |      |      |     |     |     |     |     |     |    |    |    | 0    | 68    |
| ATCC/ATGG | 28   | 8    | 12  |     |     |      |      |     |     |     |     |     |     |    |    |    | 0    | 48    |
| ATCG/ATCG | 2    |      |     |     |     |      |      |     |     |     |     |     |     |    |    |    | 0    | 2     |
| ATGC/ATGC | 10   |      |     |     |     |      |      |     |     |     |     |     |     |    |    |    | 0    | 10    |
| CCCG/CGGG | 44   | 6    |     | 2   |     |      |      |     |     |     |     |     |     |    |    |    | 0    | 52    |
| CCGG/CCGG | 11   |      |     |     |     |      |      |     |     |     |     |     |     |    |    |    | 0    | 11    |

|             |     |   |    |
|-------------|-----|---|----|
| AAAAC/GTTTT | 6   | 0 | 6  |
| AAAAG/CTTTT | 3   | 0 | 3  |
| AAAAT/ATTTT | 2   | 0 | 2  |
| AAACC/GGTTT | 3 1 | 0 | 4  |
| AAAGG/CCTTT | 2   | 0 | 2  |
| AAATC/ATTTG | 5   | 0 | 5  |
| AACAC/GTGTT | 1   | 0 | 1  |
| AACCC/GGGTT | 1   | 0 | 1  |
| AACTC/AGTTG | 1   | 0 | 1  |
| AACTG/AGTTC | 3   | 0 | 3  |
| AAGAG/CTCTT | 8 4 | 0 | 12 |
| AAGCC/CTTGG | 5   | 0 | 5  |
| AAGCT/AGCTT | 1   | 0 | 1  |
| AAGGG/CCCTT | 12  | 0 | 12 |
| AATAC/ATTGT | 2 1 | 0 | 3  |
| AATCT/AGATT | 2   | 0 | 2  |
| ACAGC/CTGTG | 1   | 0 | 1  |
| ACATC/ATGTG | 2   | 0 | 2  |
| ACCCC/GGGGT | 6   | 0 | 6  |
| ACCCG/CGGGT | 1   | 0 | 1  |
| ACCCT/AGGGT | 6   | 0 | 6  |
| ACCTC/AGGTG | 1   | 0 | 1  |
| ACCTG/AGGTC | 2   | 0 | 2  |
| ACGAG/CGTCT | 2   | 0 | 2  |
| ACGCC/CGTGG | 2   | 0 | 2  |
| ACGGG/CCCGT | 1   | 0 | 1  |
| ACTCC/AGTGG | 1   | 0 | 1  |
| AGAGC/CTCTG | 5   | 0 | 5  |
| AGAGG/CCTCT | 5 2 | 0 | 7  |
| AGATG/ATCTC | 2   | 0 | 2  |
| AGCCC/CTGGG | 1   | 0 | 1  |
| AGCGC/CGCTG | 1   | 0 | 1  |
| AGCGG/CCGCT | 1   | 0 | 1  |
| AGCTC/AGCTG | 3   | 0 | 3  |
| AGGCG/CCTCG | 1   | 0 | 1  |
| AGGGC/CCCTG | 8   | 0 | 8  |
| AGGGG/CCCCT | 2   | 0 | 2  |
| ATATC/ATATG | 1   | 0 | 1  |
| ATCCC/ATGGG | 7   | 0 | 7  |
| ATGCC/ATGGC | 1   | 0 | 1  |
| CCCCG/CGGG  | 4   | 0 | 4  |
| G           |     |   |    |
| AAAATG/ATTT | 1   | 0 | 1  |
| TC          |     |   |    |
| AAAGCC/CTTT | 3   | 0 | 3  |
| GG          |     |   |    |
| AACGGC/CCGT | 2   | 0 | 2  |
| TG          |     |   |    |
| AAGAGG/CCT  | 2 1 | 0 | 3  |
| CTT         |     |   |    |

|                   |     |   |   |
|-------------------|-----|---|---|
| AAGCCG/CGG<br>CTT | 1   | 0 | 1 |
| AAGGAG/CCTT<br>CT | 1   | 0 | 1 |
| AATGGC/ATTG<br>CC | 1   | 0 | 1 |
| AATGTG/ACAT<br>TC | 2   | 0 | 2 |
| ACACAT/ATGT<br>GT | 1 2 | 0 | 3 |
| ACACGC/CGTG<br>TG | 4   | 0 | 4 |
| ACAGGC/CCTG<br>TG | 1   | 0 | 1 |
| ACCAGC/CTGG<br>TG | 4   | 0 | 4 |
| ACCTCC/AGGT<br>GG | 3 2 | 0 | 5 |
| ACCTCG/AGGT<br>CG | 1   | 0 | 1 |
| ACGAGG/CCTC<br>GT | 1   | 0 | 1 |
| ACGCAG/CGTC<br>TG | 3   | 0 | 3 |
| ACGGCG/CCGT<br>CG | 3   | 0 | 3 |
| AGAGGC/CCTC<br>TG | 1   | 0 | 1 |
| AGATGG/ATCT<br>CC | 3   | 0 | 3 |
| AGCAGG/CCT<br>GCT | 7 2 | 0 | 9 |
| AGCGGC/CCG<br>CTG | 1   | 0 | 1 |
| AGCTCC/AGCT<br>GG | 1   | 0 | 1 |
| AGGATG/ATCC<br>TC | 2   | 0 | 2 |
| AGGCGG/CCG<br>CCT | 7   | 0 | 7 |
| ATCCCC/ATGG<br>GG | 2   | 0 | 2 |
| ATCGCC/ATGG<br>CG | 1   | 0 | 1 |
| ATCGGC/ATGC<br>CG | 5   | 0 | 5 |
| CCCCCG/CGGG<br>GG | 1   | 0 | 1 |

**Table S4.** List of the 58 primer pairs with expected size of PCR products.

| Primers | Repeat Motif | Forward Primer (5'-3') | Tm (°C) | Reverse Primer (5'-3') | Tm (°C) | Note        |
|---------|--------------|------------------------|---------|------------------------|---------|-------------|
| MDEB002 | (CT)9        | AGTCCTTAGCCCCTAGGACG   | 60.106  | AAAGAGAGGAGGGCTGGGAT   | 59.955  | Polymorphic |
| MDEB024 | (CAT)5       | ATGTATGGGGCGGGCATATG   | 60.034  | CAAACCGACGAGAGGTGTCA   | 59.968  | Polymorphic |
| MDEB025 | (CCA)5       | GATCCGACGACCTCAGCTTC   | 60.249  | CCATCTGCAGCTGGTCAAGA   | 60.036  | Polymorphic |
| MDEB027 | (CCG)5       | CATCGACATCACCTGGGTGT   | 59.75   | TTCTTGTTCCCCACGGCTTC   | 60.536  | Polymorphic |
| MDEB046 | (CTA)6       | TACATCAAAGCGCAGGCAGA   | 60.036  | AAGGAGTTGACATGGCTCAGG  | 60.036  | Polymorphic |
| MDEB050 | (CTG)5       | CGCCTACACAAGATGGTGGT   | 60.036  | CACTCTGTCGAAATGCAGCG   | 59.906  | Polymorphic |
| MDEB051 | (CTG)5       | GCCTGCTGAAGATGCTCAGA   | 60.108  | CCAGCAGTACAACCAGAGCA   | 59.965  | Polymorphic |
| MDEB054 | (GAC)6       | ACCGGCATTTCTTACACTGG   | 60.035  | TCCTCACAGCTCTCACCAACA  | 60.47   | Polymorphic |
| MDEB063 | (GCG)5       | CACTTCTCCCCTCGCGATG    | 60.227  | AACATGAGCAGGCTCTCGAC   | 60.108  | Polymorphic |
| MDEB065 | (GCG)5       | CAAGAGCGACCTGGTGAAGT   | 59.966  | CTCGTTCCCATCATCCGCAAA  | 60.462  | Polymorphic |
| MDEB067 | (GCG)6       | AATGGTTCGTTGTCGTCGGA   | 59.968  | GTGGTGGACAAGTAGCTGCT   | 59.965  | Polymorphic |
| MDEB068 | (GCT)5       | GTAAGTGTCTTCGGCGGGA    | 60.038  | CCACCGAAGAACGACTACCC   | 60.109  | Polymorphic |
| MDEB076 | (GGC)5       | ATCCACGTTTCCCTCTGCTG   | 60.036  | CCAGTCCCCACTACCAGCTA   | 60.325  | Polymorphic |
| MDEB083 | (GTC)5       | TGAGGCTGGGACTGAAGAGT   | 60.179  | CTTCTCAGCTGCTGACCTCC   | 60.108  | Polymorphic |
| MDEB091 | (TCA)6       | ACCCCCAGCTACTACCATGT   | 59.956  | GAGATGGAGCCTACCGAAGC   | 59.967  | Polymorphic |
| MDEB094 | (TCG)5       | CGCCTCTTCCACGTCTTTGA   | 60.32   | GATGGTGCTCCTCGAGATCG   | 60.04   | Polymorphic |
| MDEB095 | (TGT)5       | CAGCTGTTCTGGAGGGTGAAG  | 59.896  | TCAGAAGGTGACGACGCTTC   | 59.969  | Polymorphic |
| MDEB100 | (TGT)5       | TGGTCGCGAGATCTTATGGG   | 59.326  | TAAACAACAGCACCTGGCCT   | 59.815  | Polymorphic |
| MDEB003 | (GA)9        | AATCGACATGAGAGCACCGG   | 60.179  | CGGCCCTTTTATCCCCTGT    | 60.034  | Monomorphic |
| MDEB004 | (AAC)6       | TTCAGGCATCCCGCTAACAG   | 60.108  | TCCTACCTCCAAGCCCTCTT   | 59.582  | Monomorphic |
| MDEB009 | (ACG)6       | GGCCTCTACGAGTTCCCCTA   | 60.106  | GGCACACCCTACACGTACTC   | 60.109  | Monomorphic |
| MDEB010 | (ACT)5       | AGGAACGCATAGGCACACTC   | 60.108  | ATTCACCCCGTGATCGATCG   | 59.968  | Monomorphic |
| MDEB012 | (AGC)5       | CGTCGTGGAAGCTGAGGTAG   | 60.179  | CTTGCAAGTTACTTCCGCCG   | 59.834  | Monomorphic |
| MDEB014 | (AGG)6       | TTCTTGAACGCCACCTCAGG   | 60.25   | AGAGAGAAGCCAAGAACCGC   | 60.037  | Monomorphic |

|         |        |                          |        |                           |        |                 |
|---------|--------|--------------------------|--------|---------------------------|--------|-----------------|
| MDEB017 | (ATC)5 | TCTTTGACCAGCTGCGAA<br>GT | 59.893 | CTGGCCGAGAACAAGATC<br>GT  | 60.109 | Monomorphi<br>c |
| MDEB020 | (CAA)5 | CAGTTCAGTAGCAGCCA<br>CCA | 59.965 | TGGGCGTCAAGTTTGGAT<br>GA  | 59.89  | Monomorphi<br>c |
| MDEB021 | (CAC)5 | CAGGATCTTCCAGCTCAC<br>CC | 59.82  | GGAGGAGTTCATGAAGCC<br>GG  | 60.463 | Monomorphi<br>c |
| MDEB022 | (CAG)5 | CAATCGACAAGCTCCCC<br>GAG | 60.808 | GGCCTCCTTGTCTTCACA<br>G   | 60.322 | Monomorphi<br>c |
| MDEB031 | (CCT)5 | GACGGTCTGGTCGAACA<br>CTT | 59.968 | GGAATCCCCTTTGACTCC<br>CG  | 60.107 | Monomorphi<br>c |
| MDEB032 | (CCT)6 | CCTCCGGCTTCAAGCTCT<br>TC | 60.743 | GAACTTGGTCTCCCTGCTC<br>C  | 60.036 | Monomorphi<br>c |
| MDEB033 | (CGA)5 | GCAACACGAACCGGAAA<br>TGA | 59.411 | TGTCTGTACATAGCTGCG<br>GC  | 60.179 | Monomorphi<br>c |
| MDEB034 | (CGA)6 | CCTCGCCGCTGGACTACA       | 61.449 | TTCTTCCGTTGCCTCTGAC<br>C  | 59.965 | Monomorphi<br>c |
| MDEB036 | (CGC)5 | GCAGTACTACCAGCAGG<br>GAC | 59.824 | GAGATCTCCGATCCACAG<br>CG  | 60.04  | Monomorphi<br>c |
| MDEB037 | (CGC)5 | CCATCACGTGATCTCCGA<br>GG | 59.969 | CCTCTCGATCCAACCTCGA<br>CG | 59.972 | Monomorphi<br>c |
| MDEB041 | (CGG)5 | TCCACTCTGTCTCGTCGA<br>CT | 59.965 | GCTGTTGCCACCTCTGATG<br>A  | 60.322 | Monomorphi<br>c |
| MDEB043 | (CGG)6 | CGCCGACAAGAACCGAG<br>ATT | 60.736 | GGACGGGGAAAATGGGG<br>ATT  | 60.033 | Monomorphi<br>c |
| MDEB047 | (CTC)5 | GCGACTGGATTAGATGG<br>CGA | 59.968 | TTCTACGCACCTTCACCGT<br>G  | 60.319 | Monomorphi<br>c |
| MDEB048 | (CTC)5 | CGGAAGCTCATCGAGAT<br>GCT | 59.968 | TGACCCTCCTCAGCAGAT<br>CA  | 59.958 | Monomorphi<br>c |
| MDEB049 | (CTC)6 | CGTCATGCCCTTGAATC<br>CT  | 60.036 | AAGACCAGAAGCAGAAG<br>GGC  | 59.963 | Monomorphi<br>c |
| MDEB053 | (GAA)5 | TTGAGGTCAGTGGCAAG<br>CAA | 60.107 | GTTTTCGCGGTCTTGACGA<br>G  | 59.839 | Monomorphi<br>c |
| MDEB066 | (GCG)6 | GGACGGCCATGCATAAC<br>AGG | 61.447 | GAGCAGCTGGTCCATCAT<br>CG  | 60.879 | Monomorphi<br>c |
| MDEB069 | (GCT)5 | TCCACCATGCTCAGCGAA<br>TT | 60.035 | TCTCGGTAAACGGTCCTT<br>GC  | 60.038 | Monomorphi<br>c |
| MDEB070 | (GCT)6 | CTCCGCATCTTTTTCAGC<br>GG | 59.902 | CGGCCGGGTAAATTCAA<br>CC   | 59.828 | Monomorphi<br>c |
| MDEB071 | (GGA)5 | GGAGAGGTGGAGTCGTC<br>GTC | 61.647 | TTCCTGTCCTTCACCAACC<br>C  | 59.523 | Monomorphi<br>c |
| MDEB072 | (GGA)5 | CCGCCGCCATGATGAAG<br>TAT | 60.604 | ACCGACTCCTCCTCGTACT<br>C  | 60.108 | Monomorphi<br>c |
| MDEB078 | (GGC)6 | GCGAAAGGGAGGGAATG<br>TCA | 60.035 | CTCCCCAACTTCCCCTCCT<br>A  | 59.956 | Monomorphi<br>c |
| MDEB082 | (GTA)5 | GAGCAGTCCAGGCCATT<br>GAT | 60.107 | TCACCACCTCCTCCTCCA<br>AG  | 60.545 | Monomorphi<br>c |
| MDEB084 | (GTC)6 | GGACGCAGAGAAGGAGT<br>ACG | 59.901 | TGTCCGTATGGCAGCGAT<br>AC  | 59.968 | Monomorphi<br>c |
| MDEB085 | (GTG)5 | ACAGATGACACGCGGTA<br>CAG | 60.109 | TCGCCAAACCTGTCTGAT<br>CC  | 60.036 | Monomorphi<br>c |

|         |        |                          |        |                           |        |                 |
|---------|--------|--------------------------|--------|---------------------------|--------|-----------------|
| MDEB087 | (GTT)5 | ATCACACAAGCCAGAGG<br>AGC | 60.036 | GCTCCAGTACAACAAACC<br>GC  | 59.763 | Monomorphi<br>c |
| MDEB088 | (TAC)5 | GCCTCCTCCGCCTCTAGT<br>AT | 60.251 | TCATGGCTGGACCCCATC<br>TA  | 60.03  | Monomorphi<br>c |
| MDEB089 | (TAG)5 | AAGCAGCGGGTATGCAA<br>AAC | 59.756 | CAAGTCGCACCAAGAAC<br>AGC  | 60.041 | Monomorphi<br>c |
| MDEB090 | (TAT)5 | AGGTGGTTGCTATTGGCT<br>CC | 60.034 | GCTGTAGATATTTTGGCG<br>CCC | 60.288 | Monomorphi<br>c |
| MDEB092 | (TCC)5 | GCAAAACGAGTGTGACT<br>GGC | 60.317 | AGAATTCCGGCGCTTCTT<br>CA  | 60.036 | Monomorphi<br>c |
| MDEB093 | (TCC)6 | GGTGAAGCTCTAGACCC<br>CCA | 60.618 | CAAGCTCAAGGACCACG<br>ACT  | 59.966 | Monomorphi<br>c |
| MDEB098 | (TGC)6 | CACATTGTCACGCTGCCA<br>AA | 59.969 | CGAATGCCTTTGGACCGT<br>TG  | 60.11  | Monomorphi<br>c |
| MDEB099 | (TGG)5 | CTCACTCGCTATGCAGCT<br>CG | 60.934 | GAGCTCCAGCACCTCCAT<br>AG  | 59.608 | Monomorphi<br>c |
| MDEB101 | (TTA)5 | GCGACATGGGCAAGAAC<br>AAG | 60.11  | GTCCCGCAAACAAGTCAC<br>AC  | 59.971 | Monomorphi<br>c |
